# Supplementary material
Source: Springer Nature journal article supplement (https://www.springermedizin.de/resource/supplementary/13690_2013_5003_MOESM2_ESM.pdf/9685584)
Supplement: MOESM2 [file 9685584]

## Internal determinants: Therapist

### THERAPIST

#### Individual

- Previous practice of non-adherence
- Lack of attention paid to the guideline
- Lack of knowledge and skills
- Limited self-evaluation
- High motivation to comply with social norm
- Low (tensional) self-efficacy
- Expected potential losses due to adherence
- Not feeling pride
- Feeling uncomfortable
- Feeling uncertain about position
- Resistance
- Low commitment towards guidelines

#### Perceived guideline characteristics

- Low relative advantages
- Low flexibility
- Low visibility of the results
- Low compatibility with current practice
- Low communicability of the guideline
- High complexity

## External determinants: Therapist

### THERAPIST

- Unfavorable social norm
- Logistic barriers

### GUIDELINES

- Lack of credibility
- Incomprehensible
- Not supportive to clinical reasoning

### PATIENT

- Expectations about treatment
- Insufficient knowledge and understanding of back pain syndrome and treatment

### PRACTICE MANAGEMENT

- Inaccurate quality management
- Commitment to high quality
- Unfavourable practice structure
- Deliberation meetings
- Materials and resources
- Electronic Patient Record
- Unfavourable practice culture
- Collective objectives
- Openness/respect
- Monitoring
- Practice organization
- Individual performance

### PROFESSIONAL ORGANIZATION

- Insufficient facilitation of professionals
- Lack of clear and consistent policy with regards guideline implementation

## Physical Therapist Behaviors

### INDICATORS OF ADHERENCE

1. Warning signs (Red flags)
2. Referral if needed
3. Application of ICF
4. Patient profile
5. Examination objective
6. Treatment objectives
7. Treatment strategies
8. Number of sessions
9. Adequate information
10. Measurement instruments
11. Aftercare
12. Report

### PROBLEMS WITH

- Clinical reasoning
- Handling psychosocial factors
- Using measurement instruments
- Patient recording

## Physical therapist's non adherence to clinical guidelines for low back pain.

## Factors in the environment of the Physical Therapist

Behaviors of the Practice managers:

- monitoring quality of care
- organizing practice meetings
- quality management including the implementation of guidelines

Patient Requests for Non-guideline adherent care

Physical therapy association

- ambiguity in guideline policy
- not supportive or insufficiently facilitating
- no continuation in guideline implementation policy

Guideline Characteristics

AWARENESS OF PERSONAL PERFORMANCE
